# Supplementary material for: Structural variants involved in high-altitude adaptation detected using single-molecule long-read sequencing
Source: PubMed Central journal article supplement (PMC10719358; doi:10.1038/s41467-023-44034-z), 2023-12-13
Supplement: 41467_2023_44034_MOESM1_ESM.pdf [file 41467_2023_44034_MOESM1_ESM.pdf]

# **Structural variants involved in high-altitude adaptation detected using single-molecule long-read sequencing**

Jinlong Shi, Zhilong Jia, Jinxiu Sun, Xiaoreng Wang, Xiaojing Zhao,  
Chenghui Zhao, Fan Liang, Xinyu Song, Jiawei Guan, Xue Jia, Jing  
Yang, Qi Chen, Kang Yu, Qian Jia, Jing Wu, Depeng Wang, Yuhui  
Xiao, Xiaoman Xu, Yinzhe Liu, Shijing Wu, Qin Zhong, Jue Wu,  
Saijia Cui, Xiaochen Bo, Zhenzhou Wu, Minsung Park, Manolis Kellis,  
Kunlun He

## **Supplementary Files**

## Contents

|                                                                                                                                                                                                             |    |
|-------------------------------------------------------------------------------------------------------------------------------------------------------------------------------------------------------------|----|
| Supplementary Figure 1. Han & Tibetan SV call set.....                                                                                                                                                      | 1  |
| Supplementary Figure 2. Characteristics of SV distribution and composition.....                                                                                                                             | 3  |
| Supplementary Figure 3. SV-based principal component analysis .....                                                                                                                                         | 4  |
| Supplementary Figure 4. Manhattan plot based on the $F_{ST}$ values of SVs, SNPs and InDels between the Han and Tibetan cohorts per chromosome and overlaps between SVs and enhancers based on EpiMap ..... | 5  |
| Supplementary Figure 5. The Gene Ontology (GO) molecular function enrichment of the proteins bound to the dbstv66240 sequence, captured by DNA pull-down assay in the 293T cell line. ....                  | 6  |
| Supplementary Figure 6. Manhattan plot of another two population-specific genomic regions.....                                                                                                              | 7  |
| Supplementary Figure 7. Enrichment analysis of population-specific SVs .....                                                                                                                                | 8  |
| Supplementary Table 1. Statistics of ONT and PacBio HiFi sequencing data.....                                                                                                                               | 9  |
| Supplementary Table 2. The orthogonal validation of ONT-based SVs against PacBio HiFi-based SVs from the same sample.....                                                                                   | 9  |
| Supplementary Table 3. AF distribution of different types of novel SVs in the Han & Tibetan population. ....                                                                                                | 9  |
| Supplementary Table 4. SV comparison between ZF1 and our Tibetan population data.....                                                                                                                       | 9  |
| Supplementary Table 5. Mean SV statistics for each sample of different AFs in the Han & Tibetan population. ....                                                                                            | 10 |
| Supplementary Table 6. SV distribution in different genomic regions in the Han & Tibetan population. ....                                                                                                   | 11 |
| Supplementary Table 7. SINE- and LINE-associated SVs in various genomic functional regions.....                                                                                                             | 12 |

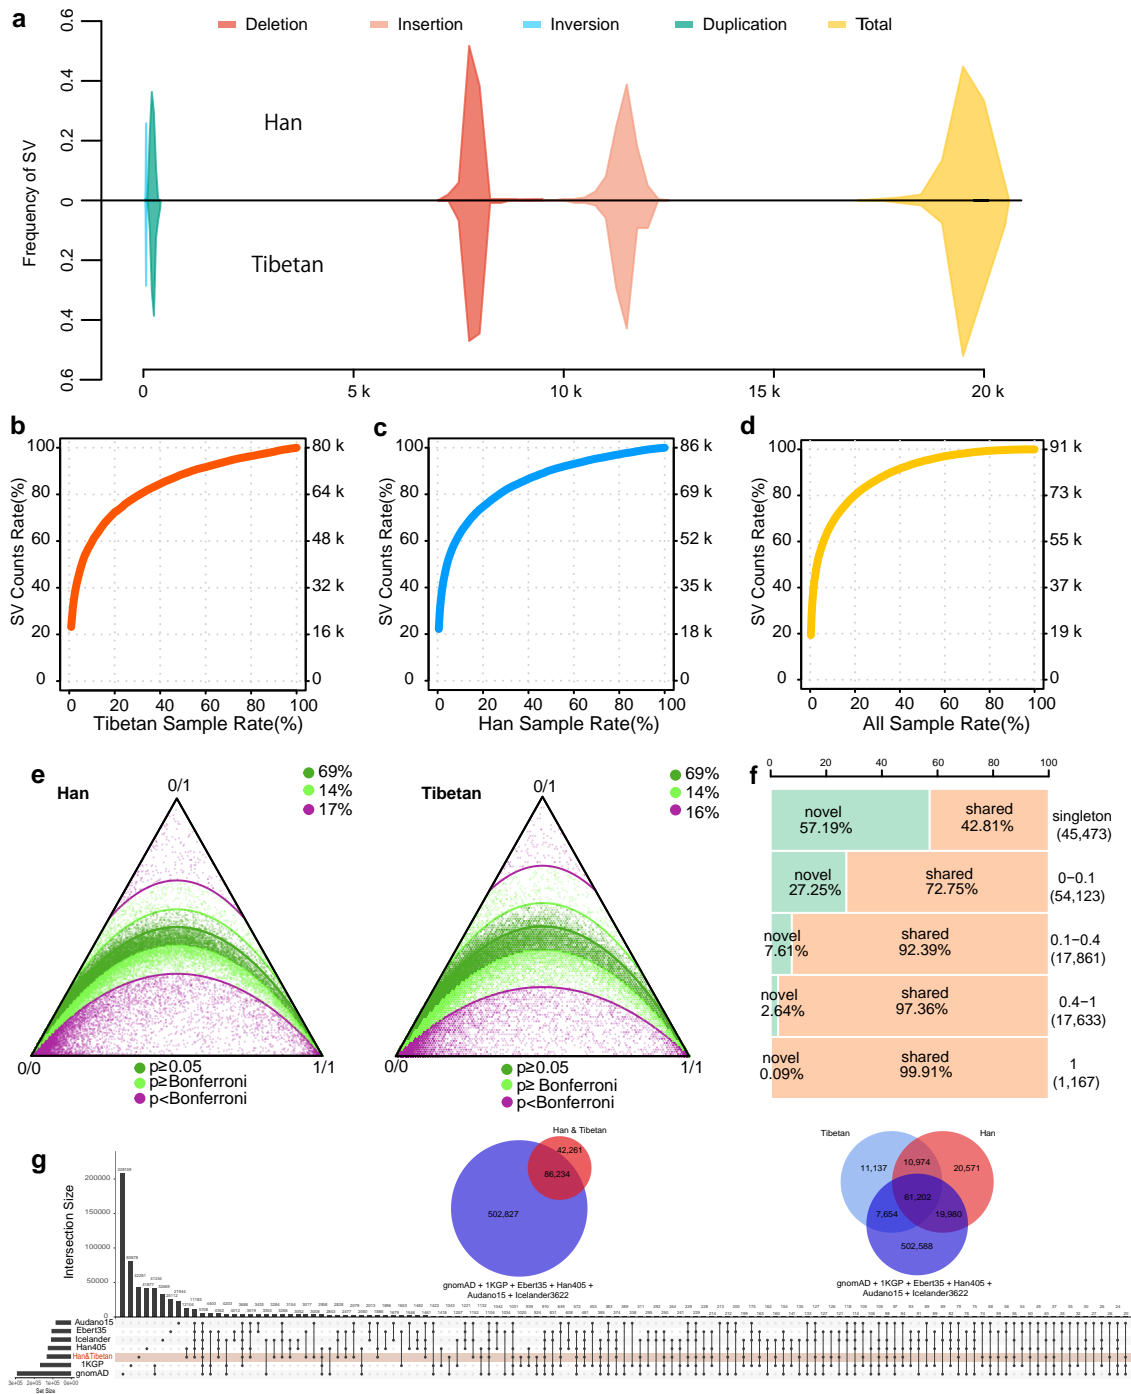

## Supplementary Figure 1. Han & Tibetan SV call set

- a, The number distribution of each type of SVs in Han and Tibetan samples.
- b, The cumulative percentage of the number of SVs excluding singletons within the Tibetan cohort.
- c, The cumulative percentage of the number of SVs excluding singletons within the Han cohort.

**d**, The cumulative percentage of the number of SVs excluding singletons within the Han and Tibetan cohort.

**e**, Overall, 83% and 84% of SVs located to autosomes were in Hardy–Weinberg equilibrium in Han and Tibetan SV call sets, respectively.

**f**, The distribution of novel and shared SVs based on SV frequency, showing a majority of novel SVs are rare SVs.

**g**, Upset plot and Venn diagrams between the Han and Tibetan SV call set and other public SVs call sets.

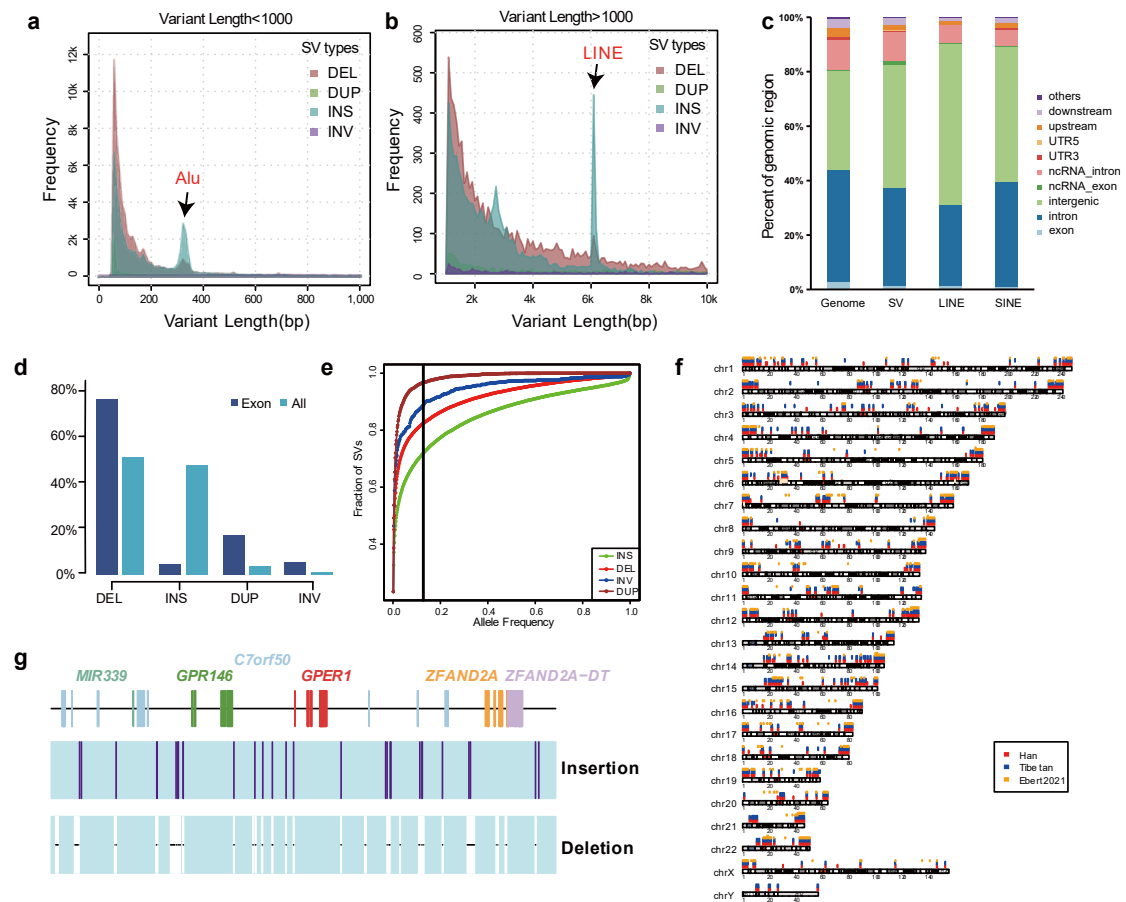

## Supplementary Figure 2. Characteristics of SV distribution and composition

**a**, Frequencies of different types of SVs with lengths less than 1 kb. The length of Alu is approximately 300 bp.

**b**, Frequencies of different types of SVs with lengths longer than 1 kb. The length of LINEs is approximately 6 kb.

**c**, The proportions of SINE- and LINE-mediated SVs and exonic SVs in different types of SVs.

**d**, The proportions of 4 types of SINE- and LINE-mediated exonic SVs.

**e**, The power law curves the frequencies of SVs and the proportions of all SVs.

**f**, The ideogram of the distribution of the Han (red), Tibetan (blue) and Ebert et al (orange) in the genome, showing 164 Mbp-length new SV hotspot regions and the HLA-related regions, *LPA* and *C7orf50* hotspots (bisque box).

**g**, The schematic diagram of 115 *C7orf50*-associated SVs.

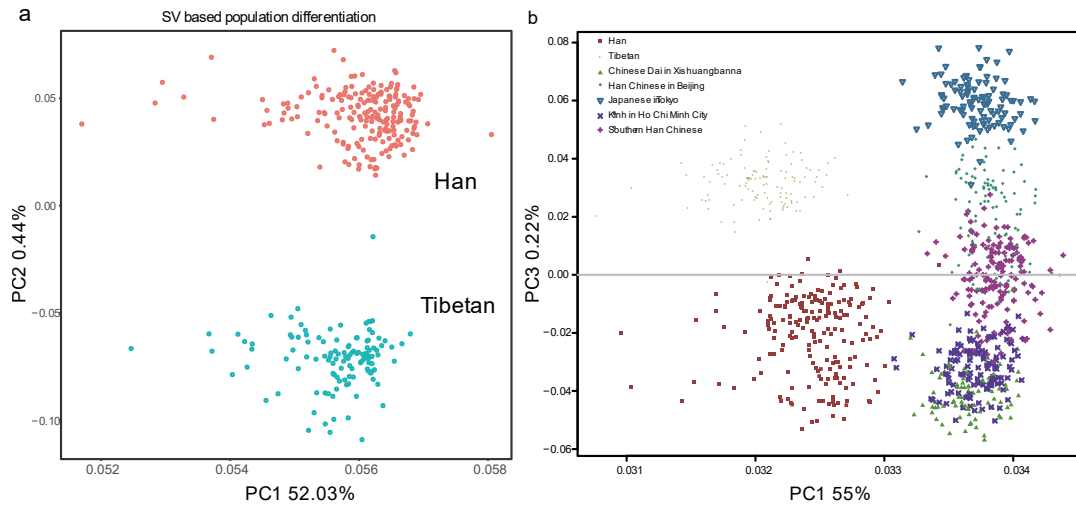

**Supplementary Figure 3. SV-based principal component analysis**

**a**, PCA plot of the SV call set of the Tibetan (green) and Han (red) cohorts indicates a clear separation between the two groups.

**b**, PCA plot of the Han & Tibetan SV call set and EAS from 1KGP showed Tibetan is close to Han, compared with other east Asians.

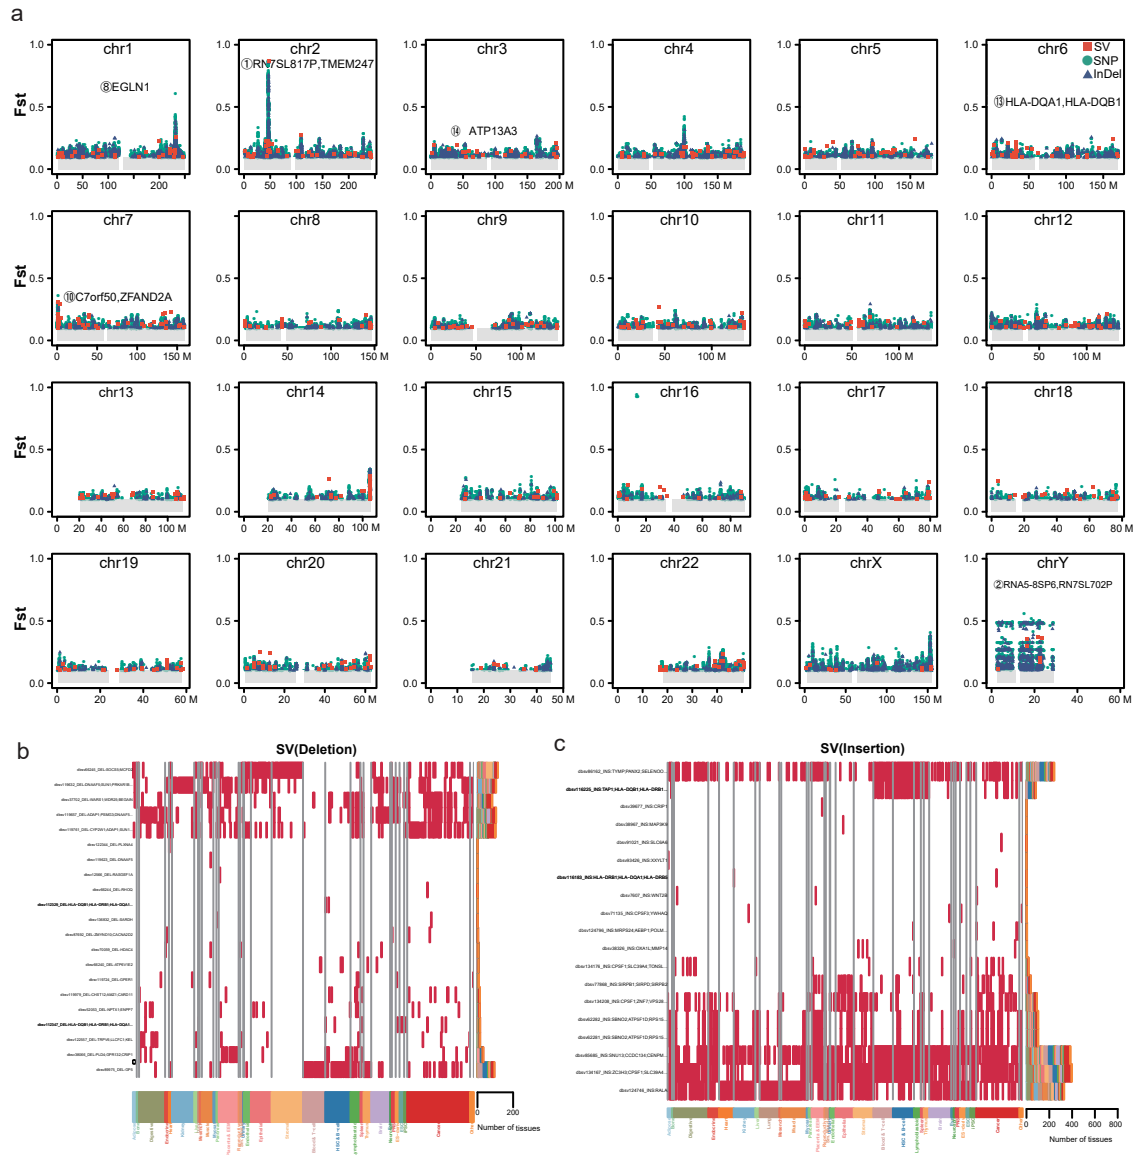

**Supplementary Figure 4. Manhattan plot based on the  $F_{ST}$  values of SVs, SNPs and InDels between the Han and Tibetan cohorts per chromosome and overlaps between SVs and enhancers based on EpiMap**

**a**, Manhattan plot for each chromosome based on the  $F_{ST}$  values (y-axis) of SVs (orange-red boxes), SNPs (blue green dots) and InDels (dark blue triangles) between the Han and Tibetan cohorts.

**b**, The SVIDs of deletions and genes targeted by enhancers (y-axis) are connected (red) with different enhancers in different tissues (x-axis).

**c**, The SVIDs of insertions and genes targeted by enhancers (y-axis) are connected (red) with different enhancers in different tissues (x-axis).

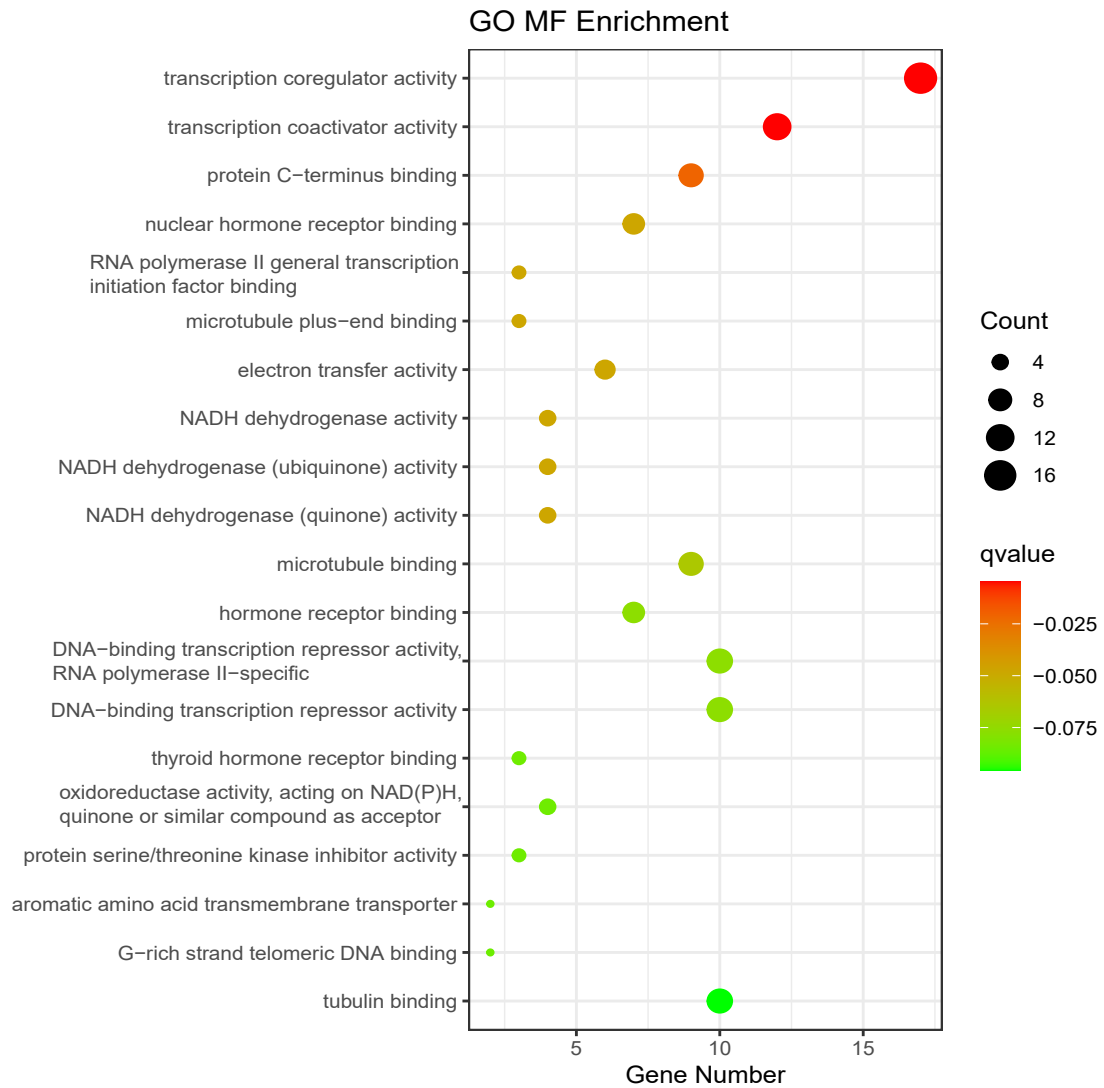

**Supplementary Figure 5. The Gene Ontology (GO) molecular function enrichment of the proteins bound to the dbstv66240 sequence, captured by DNA pull-down assay in the 293T cell line**



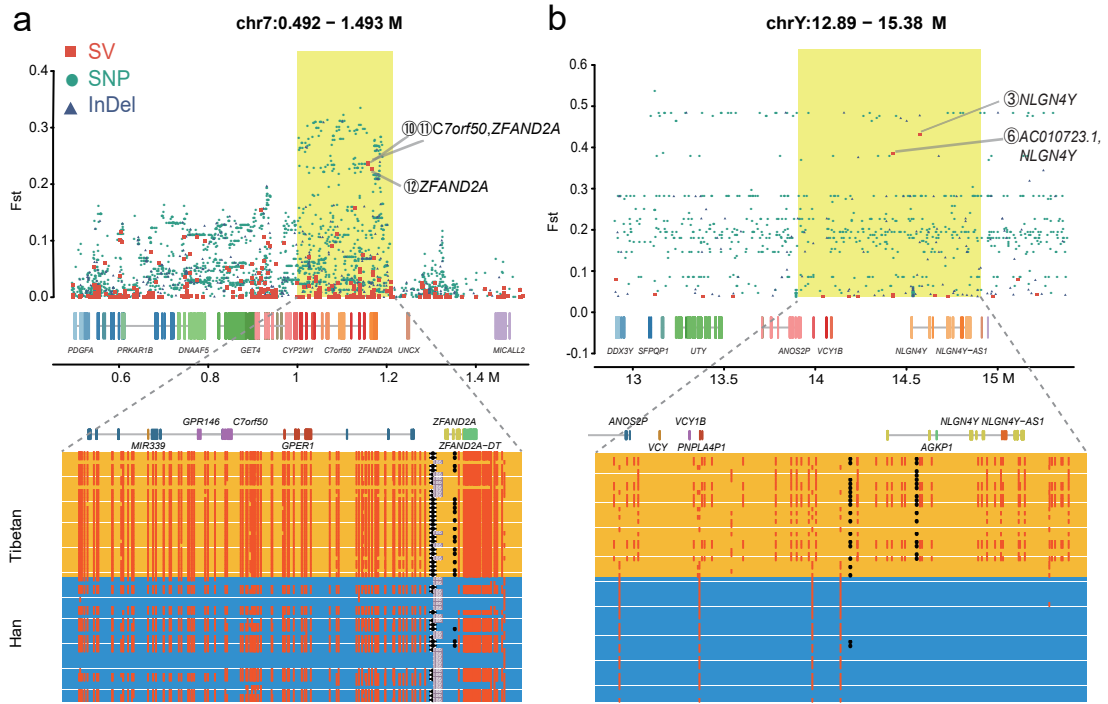

**Supplementary Figure 6. Manhattan plot of another two population-specific genomic regions**

**a**, Manhattan plot of the region near the *ZFAND2A* gene based on the  $F_{ST}$  values of SVs, SNPs and InDels between the Han and Tibetan cohorts.

**b**, Manhattan plot of the region near the *NLGN4Y* gene based on the  $F_{ST}$  values of SVs, SNPs and InDels between the Han and Tibetan cohorts.

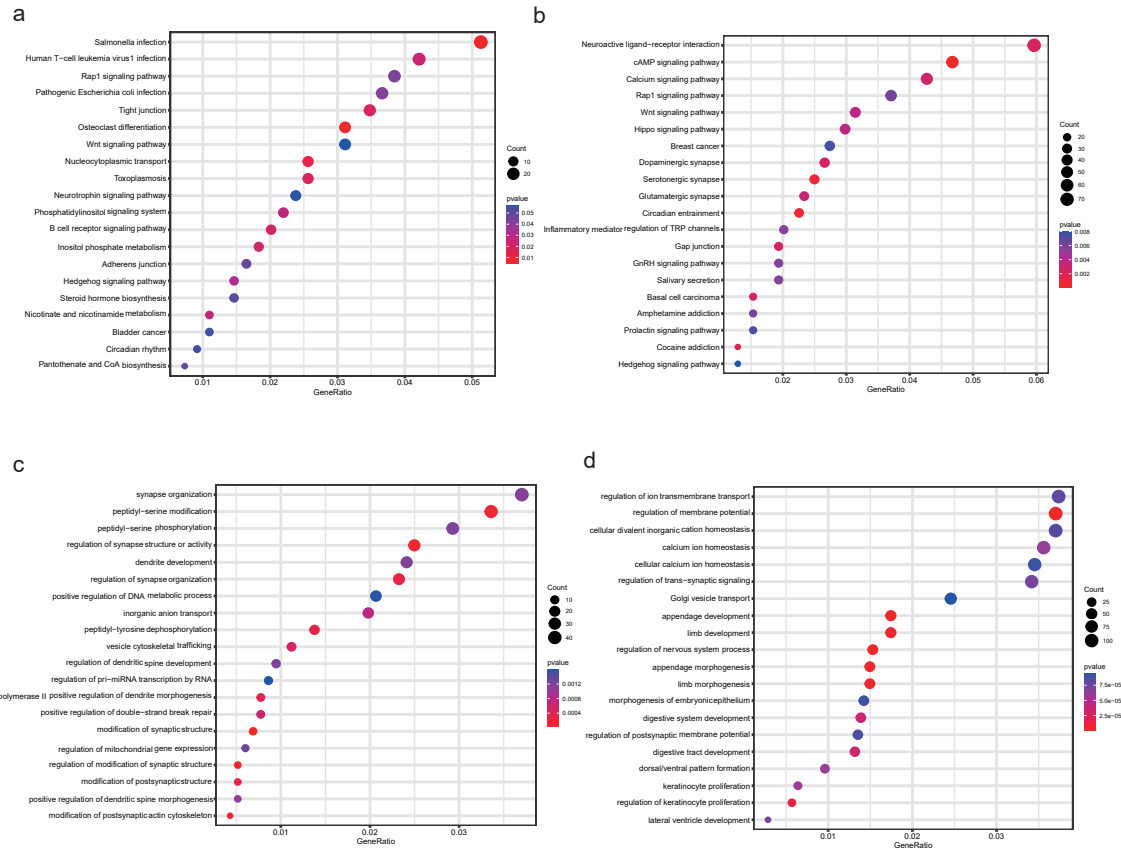

## Supplementary Figure 7. Enrichment analysis of population-specific SVs

**a**, Top 20 KEGG pathways of Tibetan-specific SVs, excluding singleton SVs.

**b**, Top 20 KEGG pathways of Han-specific SVs, excluding singleton SVs.

**c**, Gene Ontology (GO) biological process enrichment terms for Tibetan-specific SVs with an  $F_{ST} > 0.1$ .

**d**, GO biological process enrichment terms of Han-specific SVs with an  $F_{ST} > 0.1$ .

Statistical significance was analyzed using one-sided over represented analysis, without further adjustments.

**Supplementary Table 1. Statistics of ONT and PacBio HiFi sequencing data**

| sample                        | num_of_reads*<br>(M) | num_of_bases*<br>(Gb) | fastq_depth<br>(X) | Read length<br>N50 (kb) |
|-------------------------------|----------------------|-----------------------|--------------------|-------------------------|
| ONT (per sample)              | 3.72±1.60            | 60.73±21.16           | 20.24±7.05         | 22.98±4.12              |
| ONT (sample AL-2-033)         | 2.04                 | 36.43                 | 12.14              | 26.85                   |
| PacBio HiFi (sample AL-2-033) | 2.24                 | 30.05                 | 10.02              | 14.53                   |

**Supplementary Table 2. The orthogonal validation of ONT-based SVs against PacBio HiFi-based SVs by the same sample**

| SV type             |                                     | DEL   | INS    | INV | DUP | All    |
|---------------------|-------------------------------------|-------|--------|-----|-----|--------|
| The whole genome    | SV counts (PacBio HiFi)             | 9,974 | 14,227 | 113 | 719 | 25,033 |
|                     | SV counts (ONT)                     | 7,811 | 11,274 | 58  | 133 | 19,276 |
|                     | Common SV counts (ONT, PacBio HiFi) | 6,430 | 8,327  | 30  | 30  | 14,817 |
| GIAB Tier 1 regions | SV number (PacBio HiFi)             | 4,603 | 6,390  | 22  | 308 | 11,323 |
|                     | SV number (ONT)                     | 4,180 | 5,428  | 10  | 33  | 9,651  |
|                     | Common SV number (ONT, PacBio HiFi) | 3,914 | 4,676  | 5   | 7   | 8,602  |

**Supplementary Table 3. AF distribution for different types novel SV in Han & Tibetan population**

| AF           | DEL    | INS    | DUP   | INV | Total   |
|--------------|--------|--------|-------|-----|---------|
| 0~0.1        | 8,275  | 3,638  | 2,655 | 180 | 14,748  |
| 0.1~0.4      | 720    | 468    | 149   | 23  | 1,360   |
| 0.4~1        | 267    | 181    | 10    | 7   | 465     |
| 1            | 0      | 1      | 0     | 0   | 1       |
| singleton    | 15,132 | 7,835  | 2,643 | 398 | 26,008  |
| <b>Total</b> | 24,394 | 12,123 | 5,457 | 608 | 42,582* |

\* Excluding SVs in dbVar and DGV

**Supplementary Table 4. SV comparison between ZF1 and our Tibetan population data**

| Type               | DEL    | DUP   | INS    | INV | ALL    |
|--------------------|--------|-------|--------|-----|--------|
| Tibetan population | 46,562 | 4,935 | 42,319 | 496 | 94,312 |
| ZF1*               | 7,387  | 1,837 | 8,172  | 183 | 17,579 |
| Common             | 6,621  | 508   | 7,251  | 63  | 14,443 |

\*ZF1 lifted to hg38

Supplementary Table 5. Mean SV statistics for each sample of different AF in Han & Tibetan population

| Allele frequency (AF) | SV number for each sample (Mean±SD) |                 |                   |                  |                |                   |                  |                  |                   |
|-----------------------|-------------------------------------|-----------------|-------------------|------------------|----------------|-------------------|------------------|------------------|-------------------|
|                       | Tibetan                             |                 |                   | Han              |                |                   | Tibetan-Han      |                  |                   |
|                       | ALL                                 | repeat region   | non-repeat region | ALL              | repeat region  | non-repeat region | ALL              | repeat region    | non-repeat region |
| <b>0~0.1</b>          | 1,549.86±124.00                     | 937.33±90.42    | 612.53±46.93      | 1,474.13±101.86  | 896.12±78.96   | 578.01±35.34      | 1,502.29±116.51  | 911.44±85.75     | 590.84±43.38      |
| <b>0.1~0.4</b>        | 3,956±142.84                        | 2,366.94±100.45 | 1,589.06±58.76    | 3,908.21±164.93  | 2347.45±105.58 | 1,560.76±73.38    | 3,925.98±158.77  | 2,354.70±104.13  | 1,571.28±69.66    |
| <b>0.4~1</b>          | 10,832.71±139.84                    | 6,760.53±101.88 | 4,066.13±64.51    | 10,790.63±170.10 | 6740.51±123.18 | 4,039.10±69.78    | 10,806.28±160.81 | 6,747.95±116.120 | 4,049.15±69.12    |
| <b>1</b>              | 1,167±0                             | 910±0           | 257±0             | 1,167±0          | 910±0          | 257±0             | 1,167±0          | 910±0            | 257±0             |
| <b>singleton</b>      | 210.95±45.95                        | 132.30±34.05    | 78.65±16.69       | 154.35±28.18     | 100.11±22.09   | 54.24±10.37       | 142.08±35.24     | 91.63±26.69      | 50.46±12.12       |

**Supplementary Table 6. SV distribution in different genomic regions in Han & Tibetan population**

| <b>SV types</b>       | <b>population</b> | <b>DEL (%)</b> | <b>INS (%)</b> | <b>DUP (%)</b> | <b>INV (%)</b> | <b>Total (%)</b> |
|-----------------------|-------------------|----------------|----------------|----------------|----------------|------------------|
| <b>LTR</b>            | Tibetan           | 2589(5.56)     | 1067(2.52)     | 222(4.50)      | 67(13.51)      | 3945(4.18)       |
|                       | Han               | 3542(5.88)     | 1250(2.48)     | 263(4.76)      | 79(12.97)      | 5134(4.40)       |
| <b>Satellite</b>      | Tibetan           | 2126(4.57)     | 1853(4.38)     | 49(0.99)       | 19(3.83)       | 4047(4.29)       |
|                       | Han               | 2855(4.74)     | 2165(4.29)     | 47(0.85)       | 28(4.60)       | 5095(4.36)       |
| <b>Simple_repeat</b>  | Tibetan           | 8096(17.39)    | 12390(29.28)   | 789(15.99)     | 75(15.12)      | 21350(22.64)     |
|                       | Han               | 10060(16.70)   | 14268(28.30)   | 927(16.79)     | 114(18.72)     | 25369(21.72)     |
| <b>Segdup</b>         | Tibetan           | 4916(10.56)    | 1386(3.28)     | 176(3.57)      | 24(4.84)       | 6502(6.89)       |
|                       | Han               | 6113(10.15)    | 1660(3.29)     | 179(3.24)      | 23(3.78)       | 7975(6.83)       |
| <b>Other</b>          | Tibetan           | 2321(4.98)     | 1788(4.23)     | 95(1.93)       | 22(4.44)       | 4226(4.48)       |
|                       | Han               | 3141(5.22)     | 2327(4.62)     | 116(2.10)      | 32(5.25)       | 5616(4.81)       |
| <b>LINE</b>           | Tibetan           | 4299(9.23)     | 2210(5.22)     | 398(8.06)      | 134(27.02)     | 7041(7.47)       |
|                       | Han               | 5862(9.73)     | 2982(5.91)     | 492(8.91)      | 158(25.94)     | 9494(8.13)       |
| <b>SINE</b>           | Tibetan           | 5438(11.68)    | 7102(16.78)    | 375(7.60)      | 107(21.57)     | 13022(13.81)     |
|                       | Han               | 7228(12.00)    | 8979(17.81)    | 446(8.08)      | 129(21.18)     | 16782(14.37)     |
| <b>Low_complexity</b> | Tibetan           | 655(1.41)      | 972(2.30)      | 106(2.15)      | 2(0.40)        | 1735(1.84)       |
|                       | Han               | 822(1.36)      | 1125(2.23)     | 104(1.88)      | 2(0.33)        | 2053(1.76)       |
| <b>non-repeat</b>     | Tibetan           | 16122(34.62)   | 13551(32.02)   | 2725(55.22)    | 46(9.27)       | 32444(34.40)     |
|                       | Han               | 20602(34.21)   | 15663(31.07)   | 2946(53.37)    | 44(7.22)       | 39255(33.62)     |
| <b>Total</b>          | Tibetan           | 46562(100)     | 42319(100)     | 4935(100)      | 496(100)       | 94315(100)       |
|                       | Han               | 60225(100)     | 50419(100)     | 5520(100)      | 609(100)       | 116776(100)      |

Supplementary Table 7. SINE and LINE associated SVs in various genomic functional regions

| Function regions | Population | Annotated with LINE |      |     |     |      |                                   | Annotated with SINE |      |     |     |       |                         |
|------------------|------------|---------------------|------|-----|-----|------|-----------------------------------|---------------------|------|-----|-----|-------|-------------------------|
|                  |            | DEL                 | INS  | DUP | INV | ALL  | Each / Total functional region(%) | DEL                 | INS  | DUP | INV | ALL   | Each / Total functional |
| exonic           | Tibetan    | 46                  | 4    | 15  | 5   | 70   | 0.99                              | 78                  | 5    | 16  | 3   | 102   | 0.78                    |
|                  | Han        | 90                  | 4    | 23  | 11  | 128  | 1.35                              | 131                 | 8    | 24  | 6   | 169   | 1.01                    |
| intronic         | Tibetan    | 1262                | 626  | 142 | 34  | 2064 | 29.31                             | 2126                | 2735 | 129 | 26  | 5016  | 38.52                   |
|                  | Han        | 1784                | 894  | 177 | 38  | 2893 | 30.47                             | 2816                | 3488 | 158 | 30  | 6492  | 38.68                   |
| intergenic       | Tibetan    | 2563                | 1372 | 207 | 74  | 4216 | 59.88                             | 2617                | 3626 | 203 | 55  | 6501  | 49.92                   |
|                  | Han        | 3398                | 1807 | 255 | 83  | 5543 | 58.38                             | 3437                | 4509 | 228 | 72  | 8246  | 49.14                   |
| ncRNA_exonic     | Tibetan    | 33                  | 5    | 3   | 2   | 43   | 0.61                              | 35                  | 18   | 4   | 5   | 62    | 0.48                    |
|                  | Han        | 54                  | 6    | 6   | 3   | 69   | 0.73                              | 66                  | 22   | 5   | 5   | 98    | 0.58                    |
| ncRNA_intronic   | Tibetan    | 279                 | 135  | 18  | 14  | 446  | 6.33                              | 286                 | 477  | 6   | 7   | 776   | 5.96                    |
|                  | Han        | 363                 | 191  | 18  | 16  | 588  | 6.19                              | 383                 | 600  | 5   | 6   | 994   | 5.92                    |
| 3'-UTR           | Tibetan    | 12                  | 6    | 1   | 0   | 19   | 0.27                              | 39                  | 47   | 0   | 1   | 87    | 0.67                    |
|                  | Han        | 15                  | 7    | 1   | 0   | 23   | 0.24                              | 46                  | 74   | 2   | 1   | 123   | 0.73                    |
| 5'-UTR           | Tibetan    | 3                   | 4    | 0   | 0   | 7    | 0.10                              | 5                   | 5    | 0   | 0   | 10    | 0.08                    |
|                  | Han        | 9                   | 3    | 1   | 0   | 13   | 0.14                              | 8                   | 5    | 0   | 0   | 13    | 0.08                    |
| upstream         | Tibetan    | 48                  | 28   | 8   | 0   | 84   | 1.19                              | 112                 | 80   | 10  | 3   | 205   | 1.57                    |
|                  | Han        | 69                  | 25   | 5   | 0   | 99   | 1.04                              | 153                 | 112  | 10  | 2   | 277   | 1.65                    |
| downstream       | Tibetan    | 46                  | 24   | 4   | 4   | 78   | 1.11                              | 119                 | 102  | 7   | 3   | 231   | 1.77                    |
|                  | Han        | 67                  | 39   | 5   | 4   | 115  | 1.21                              | 159                 | 150  | 13  | 2   | 324   | 1.93                    |
| others           | Tibetan    | 7                   | 6    | 0   | 1   | 14   | 0.20                              | 21                  | 7    | 0   | 4   | 32    | 0.25                    |
|                  | Han        | 13                  | 6    | 1   | 3   | 23   | 0.24                              | 29                  | 11   | 1   | 5   | 46    | 0.27                    |
| ALL              | Tibetan    | 4299                | 2210 | 398 | 134 | 7041 | -                                 | 5438                | 7102 | 375 | 107 | 13022 | -                       |
|                  | Han        | 5862                | 2982 | 492 | 158 | 9494 | -                                 | 7228                | 8979 | 446 | 129 | 16782 | -                       |
